# Supplementary material for: The effect of DNA extraction methodology on gut microbiota research applications
Source: PubMed Central journal article supplement (PMC4960752; doi:10.1186/s13104-016-2171-7), 2016-07-26

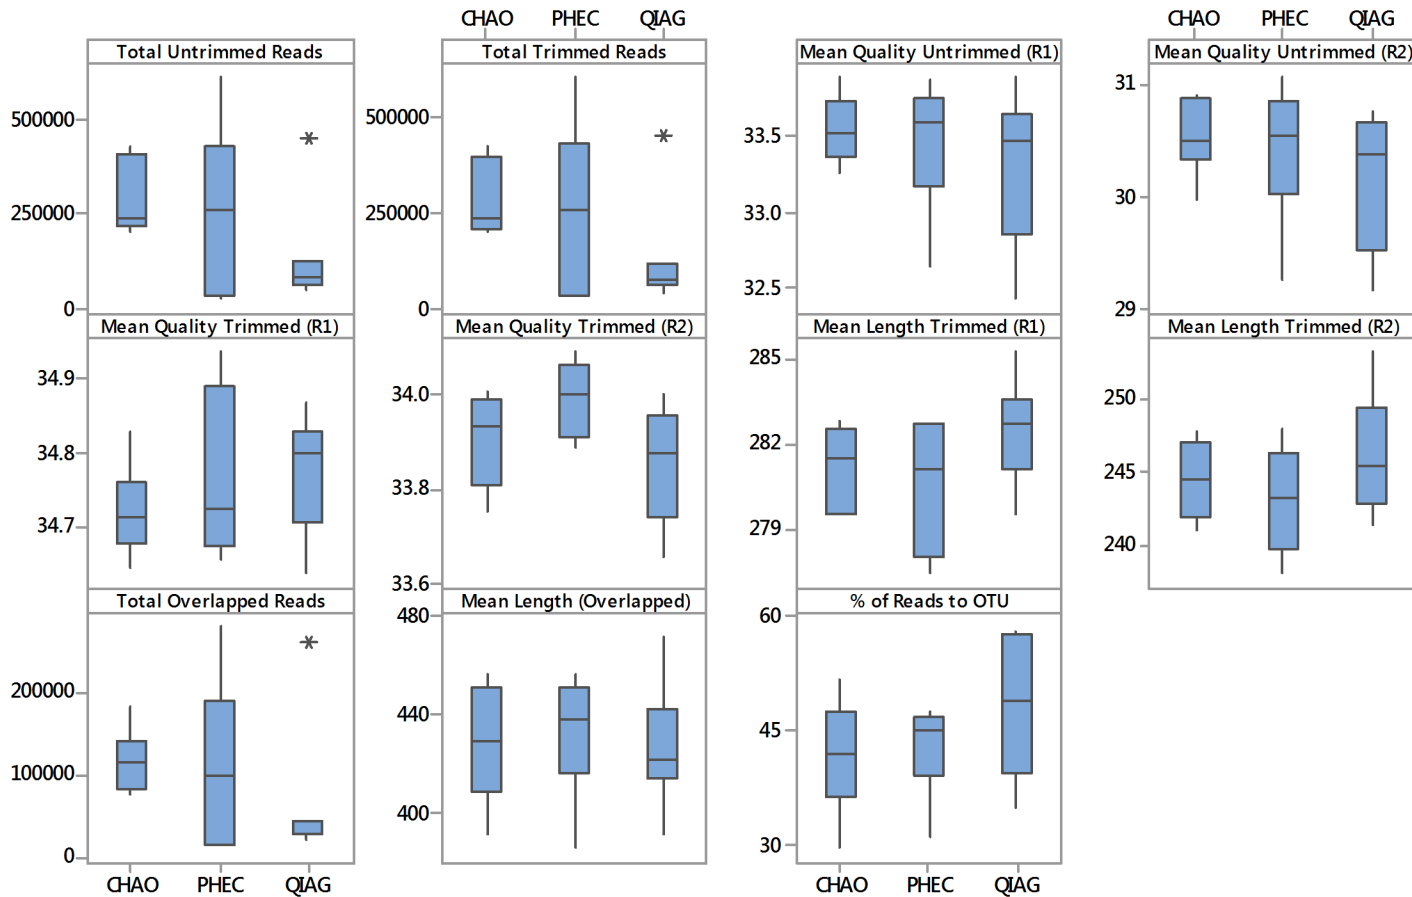

Supplement: 13104_2016_2171_MOESM1_ESM.pdf [file 13104_2016_2171_MOESM1_ESM.pdf]
